## Retraction for: Cationic solid lipid nanoparticles loaded by integrin $\beta 1$ plasmid DNA attenuates IL-1 $\beta$ -induced apoptosis of chondrocyte

Yuejiang Zhao<sup>1</sup>, Hanwen Chen<sup>1</sup>, Lu Wang<sup>1</sup>, Zhiyuan Guo<sup>1</sup>, Shijie Liu<sup>2</sup>, Simin Luo<sup>3</sup>

<sup>1</sup>The First Department of Orthopedics, Cangzhou Central Hospital, Cangzhou, Hebei Province, China

<sup>2</sup>Department of Joint Surgery, Xingtian Hospital Affiliated to Shunde Hospital of Southern Medical University, Foshan, Guangdong Province, China

<sup>3</sup>Department of Bone and Joint Surgery, The First Affiliated Hospital, Jinan University, Guangzhou, Guangdong Province, China

**Correspondence to:** Yuejiang Zhao; email: [zhaoyuejiang18@126.com](mailto:zhaoyuejiang18@126.com), <https://orcid.org/0000-0002-1269-7285>

**Keywords:** osteoarthritis, integrin  $\beta 1$ , cationic solid lipid nanoparticles, chondrocytes

**Original article:** *Aging (Albany NY)* 2020; 12: pp 22527—22537

PMID: [33289706](https://pubmed.ncbi.nlm.nih.gov/33289706/)

PMCID: [PMC7746374](https://pubmed.ncbi.nlm.nih.gov/PMC7746374/)

doi: [10.18632/aging.103656](https://doi.org/10.18632/aging.103656)

**This article has been retracted:** Aging has completed its investigation of this paper after receiving alerts from the PubPeer platform regarding multiple inconsistencies in **Figure 4B** as well as duplication of results from a separately published paper from a different author group [1]. We confirmed that **Figure 2A**, "Gel retardation assay of naked pDNA and SLNs/pDNA complexes with the different mass ratio," duplicates Figure 1D, "Gel retardation assay of naked siRNA and MWNT/Sor/siRNA complexes with the different N/P ratio," published by other authors [1]. We also found internal duplications of results with BrdU- and DAPI-stained cells from other experimental groups presented in **Figure 4B** as well as inconsistency between the BrdU and DAPI images from the same experimental group and, as a result, a disconnect in the merged images. The authors notified us that they see the problems in the paper and all authors agreed that the article should be retracted.

### REFERENCES

1. Wen Z, Feng Y, Hu Y, Lian L, Huang H, Guo L, Chen S, Yang Q, Zhang M, Wan L, Xu K, Degejirifu, Yan X. Multiwalled carbon nanotubes co-delivering sorafenib and epidermal growth factor receptor siRNA enhanced tumor-suppressing effect on liver cancer. *Aging (Albany NY)*. 2021; 13:1872-1882. <https://doi.org/10.18632/aging.103905> PMID: [33440348](https://pubmed.ncbi.nlm.nih.gov/33440348/)
